# Supplementary material
Source: PubMed Central journal article supplement (PMC130505)
Supplement: pnas_192184599_3.pdf [file pnas_192184599_3.pdf]

**Cons A** TTGGACCTTGGACCTGGACAGGCGGTCCGCCTCACGGCGAGTACTGTCTTGCTGGGTCTTTCCTCTTGGTGATCTGTGTGTTTCGGCAGCAGGGAACCAGGACCTTTA  
CR18S002 .....  
CR18S012 .....  
CR18S013 .....  
CR18S018 .....  
CR18S024 .....  
CR18S034 .....  
CR18S043 .....  
CR18S044 .....  
CR18S047 .....  
CR18S050 .....  
CR18S053 .....  
CR18S056 .....C.....

**Cons B** TCGAACTTCGGTCCTTGTGTTGGTTCGGTCCGCCTTCTTGGTGTTACTTACTCAACGAGGACTTACCTCCTGGTGGAGCTGCAATGTCCTTTACTGGGTGTGTAGGGAACCAGGACGTTTA  
CR18S003 .....A.....  
CR18S006 .....T.....  
CR18S008 .....AA.....  
CR18S010 .....A.....  
CR18S026 .....A.....  
CR18S031 .....T.....  
CR18S035 .....G.....T.....  
CR18S036 .....T.....  
CR18S045 .....T.....  
CR18S049 .....T.....  
CR18S051 .....C.....  
CR18S057 .....AA.....  
CR18S058 .....A.....  
CR18S060 .....T.....  
CR18S061 .....A.....  
CR18S063 .....A.....  
I18S003 .....  
I18S006 .....C.....G.....  
I18S009 .....A.....C.....  
I18S010 .....A.....  
I18S011 .....C.....G.....N.....G.....C.....  
I18S016 .....A.....  
I18S019 .....A.....  
I18S023 .....A.....G.....  
I18S024 .....A.....

**Cons C** TTGGACCTTGGGCCGGGTTCGGCCGGTCCGCCTCACGGCGAGCACCGACCTACTCGACCCTTCGGCCGGCATCGCGCTCCTAGCCTTAATTGGCCGGGTCGTGTTTCGGCATCGTTA  
CR18S004 .....G.....  
CR18S028 .....  
CR18S029 .....  
CR18S032 .....

**Cons D** TTGGATCTTGGGTCGTAAGGGTTGGTCCGCCTACTCGGTGTGCACCTGCCCTCCCGTCCCTTTTGTTCGGCGGGCGTGCCTCCGGCCTTAATTGGCTGGGTTCGGCGCTGTTA  
CR18S005 .....  
CR18S015 .....  
CR18S016 .....  
CR18S017 .....  
CR18S021 .....  
CR18S027 .....  
CR18S030 .....  
CR18S037 .....  
CR18S039 .....  
CR18S042 .....A.....  
CR18S048 .....  
CR18S052 .....  
CR18S054 .....C.....

**Cons E** TTGAACCTTGGGTTTGGTTGGTTCGGTCCGCCTCACCGGTGCACTGATCCGACCGAATCTTTCCTTCTGGGGAACCGTATGCCTTCATTGGGTGTACTGGAGAACCAGGACTTTTA  
CR18S009 .....  
CR18S011 .....  
CR18S019 .....  
CR18S023 .....A.....  
CR18S038 .....  
CR18S038 .....  
I18S002 .....G.....  
I18S004 .....G.....

**CR18S022** TTGGATCTCGGGGCGGGGTGAGCGGTCCGCCTCTTTTGGTGTGCACTGGTTCGCTCCGCCTTTTCTGTTCGGGGACGCGCTCTTGGCCTTCATTGGCTGGGACGTGGATTTCGGCGATGTTA

**I18S001** TTGAACCTCAGGCTTGGTTGGTTGGTCCGCCTCACGGTGTGACTGATCGACTGAGCCTTACCTCTTGGTGAGCCAGCATGCCGTTTATTTCGGTGTGTGGGGAACCAGGATTTTTA

**Cons F** TCGAACTTCGGTCCCTGTCGGTTCGGTCCGCCTTCTTGGTGTGACTTACTCGACGGGGACTTACCTCCTGGTGAGCTGCGATGTCCTTTACTGGGTGTGTAGGGAACCAGGACGTTTA  
I18S005 .....  
I18S007 .....T.....C.....  
I18S018 .....  
I18S021 .....T.....CN.....  
I18S022 .....  
I18S025 .....T.....C.....  
I18S026 .....C.....  
I18S027 .....-.....N.....N.....

**Cons G** TTGGACTTTGGGTTGGTTCGGCCGGTCCGCCCTCTGGGTGTGCACCGGTTTACTCGTCCCTTCTGTTCGGCGATACGCTCCTAGCCTTAATTGGCCGGGTTCGTCCTCCGGCGCTGTTA  
I18S008 .....  
I18S012 .....  
I18S013 .....NT.....  
I18S014 .....  
I18S015 .....A.....

**Cons H** TATCACATCGAGCCTGTTGCTGGGGAAGACAACCAATGGATCTGTTAT  
IrbcL(252f/320r) 038 .....  
IrbcL(252f/320r) 036 .....A.....G.....  
IrbcL(252f/320r) 034 .....G.....  
IrbcL(252f/320r) 033 .....  
IrbcL(252f/320r) 032 .....  
IrbcL(252f/320r) 031 .....T.....  
IrbcL(252f/320r) 030 .....  
IrbcL(252f/320r) 029 .....  
IrbcL(252f/320r) 024 .....G.....  
IrbcL(252f/320r) 015 .....  
IrbcL(252f/320r) 013 .....  
IrbcL(252f/320r) 004 .....A.....G.....  
IrbcL(252f/320r) 003 .....  
IrbcL(252f/320r) 002 .....  
IrbcL(252f/320r) 001 .....G.....

**Cons I** GGTACATGGACAACCTGTGTGGACCGATGGACTTACTAGTCTTGATCGTTA  
CRrbcL(170f/240r) 001 .....  
CRrbcL(170f/240r) 005 .....  
CRrbcL(170f/240r) 006 .....  
CRrbcL(170f/240r) 008 .....  
CRrbcL(170f/240r) 009 .....G.....  
CRrbcL(170f/240r) 010 .....  
CRrbcL(170f/240r) 012 .....  
CRrbcL(170f/240r) 013 .....  
CRrbcL(170f/240r) 016 .....  
CRrbcL(170f/240r) 018 .....  
CRrbcL(170f/240r) 020 .....  
CRrbcL(170f/240r) 025 .....

**Cons J** GGTACATGGACAACCTGTTGGACTGATGGACTTACCAGTCTTGATCGTTA  
CRrbcL(170f/240r) 002 .....  
CRrbcL(170f/240r) 003 .....  
CRrbcL(170f/240r) 004 .....  
CRrbcL(170f/240r) 014 .....  
CRrbcL(170f/240r) 015 A.....  
CRrbcL(170f/240r) 017 .....  
CRrbcL(170f/240r) 019 .A.....  
CRrbcL(170f/240r) 021 .....

**Cons K** CCCGTCACCCTCCTCAAGTAGGCACAGTACACTCAAATTTATTTGCACGTATTAATCATATGAGAGGAGACAAGTC  
I12S001 .....  
I12S010 .....  
I12S013 .....  
I12S015 .....  
I12S017 .....  
I12S019 .....  
I12S023 .....  
I12S026 .....  
I12S029 .....

**Cons L**      CCGTCACCCTCCTCAAGTAAATATAATGCACTCAAGCCTATTTACACGCATCAACTACATGAGAGGAGACAAGTC  
CR12S006      .....  
CR12S010      .....
